## **Screening for Carbapenem-Resistant *Acinetobacter baumannii* Colonization Sites: An Implication for Combination of Horizontal and Vertical Approaches**

TO THE EDITOR—Active surveillance cultures for multidrug-resistant gram-negative bacteria, including carbapenem-resistant (CR) *Acinetobacter baumannii*, has been suggested by several authorities as a strategy to control outbreaks of multidrug-resistant gram-negative bacteria among at-risk populations, including patients in intensive care, burn, stem cell transplant, and oncology units; patients transferred from facilities known to have high prevalence rates; roommates of colonized or infected persons; and patients known to have been previously infected or colonized [1, 2]. Despite these recommendations, standardized screening schemes and understanding of which body sites are most commonly colonized by these pathogens are lacking. Knowing which anatomic locations are most commonly colonized by CR *A. baumannii* is important to inform appropriate infection prevention interventions and cost-effective screening policies.

We performed a prospective cohort study in a medical intensive care unit (ICU) at Thammasat University Hospital, a 650-bed hospital in central Thailand. From 1 January 2007 to 31 October 2012, all consecutive adult patients in whom CR *A. baumannii* was detected in 1 or more routine clinical cultures were included in this study. Study patients were then screened for colonization; urine (via urinary catheter), tracheal aspirate, rectal, and sternal skin cultures were obtained. Patients who did not undergo screening of all 4 body sites or who were receiving antibiotics active against CR *A. baumannii* were excluded. Specimens were transported and processed within 1 hour of procurement for culture on MacConkey agar plates. Bacterial colonies suspected

of being *A. baumannii* were identified using standard microbiological techniques [3], and antibiotic susceptibility results were interpreted according to Clinical and Laboratory Standards Institute breakpoints [4]. This study was approved by the Thammasat University Institutional Review Board.

During the study period, 129 of 160 patients (80%) had all 4 body sites cultured for CR *A. baumannii*; 31 patients were excluded because they were discharged from our hospital prior to testing or were receiving antibiotics with activity against CR *A. baumannii*. The median age was 64 years (range, 26–78 years) and 65% (84/129) were male. Carbapenem-resistant

*A. baumannii* was isolated from at least 1 body site in 108 (85%) patients with a history of a positive clinical culture. CR *A. baumannii* was most commonly recovered from tracheal aspirates (103 [80%]), followed by rectal specimens (89 [69%]), sternal skin swabs (67 [52%]), and urine (32 [25%]). Notably, 59 (46%) patients had >1 positive body site. Performing both a rectal and tracheal aspirate culture had the highest yield of any combination of 2 body sites (97 [75%]). An overview of the pattern of colonization in the 129 patients is summarized in Table 1.

Limitations of our study include an observational design, being conducted at a single center, no cultures of noninfect

skin, and relatively small sample size. Despite these limitations, our study has some important implications. We found that a combination of tracheal aspirate and rectum specimens identified 75% of patients with a history of CR *A. baumannii*, suggesting the role of these 2 sites as screening sites to detect CR *A. baumannii* in this patient population. Several authors have commented on having horizontal and vertical components to infection prevention programs. Horizontal control was defined as an approach in which all organisms in any site were targeted, while vertical control was defined as an approach in which only specific organisms were targeted [5, 6]. Given that CR *A. baumannii* was detected in various sites among ICU patients, our findings support the role of a “horizontal” infection control approach (eg, hand hygiene, contact isolation) together with a “vertical” infection control approach (eg, use of chlorhexidine mouth care) to control the spread of CR *A. baumannii* in this patient population [5, 6]. Additional studies to assess the incremental value of vertical infection control approach on top of horizontal infection control approach should be the key questions to control CR *A. baumannii* in ICU populations.

## Notes

**Financial support.** This work was supported by the National Research University Project of the Thailand Office of Higher Education Commission (to A. A.).

**Potential conflicts of interest.** Both authors: No reported conflicts.

Both authors have submitted the ICMJE Form for Disclosure of Potential Conflicts of Interest. Conflicts that the editors consider relevant to the content of the manuscript have been disclosed.

**Anucha Apisarntharak<sup>1</sup> and David K. Warren<sup>2</sup>**

<sup>1</sup>Division of Infectious Diseases, Faculty of Medicine, Thammasat University Hospital, Pathumthani, Thailand; and <sup>2</sup>Division of Infectious Diseases, Washington University School of Medicine, St Louis, Missouri

## References

- Centers for Disease Control and Prevention (CDC). Guidance for control of infections

**Table 1. Colonization Patterns of Carbapenem-Resistant *Acinetobacter baumannii* Among 129 Intensive Care Unit Patients**

| Colonization Site                                                                     | No. (%) of Patients |
|---------------------------------------------------------------------------------------|---------------------|
| <b>One site</b>                                                                       |                     |
| Tracheal aspirate                                                                     | 35 (27)             |
| Rectum                                                                                | 24 (19)             |
| Sternal skin                                                                          | 7 (5)               |
| Urine                                                                                 | 4 (3)               |
| <b>Two sites</b>                                                                      |                     |
| Tracheal aspirate, rectum                                                             | 38 (29)             |
| Tracheal aspirate, sternal skin                                                       | 7 (5)               |
| Tracheal aspirate, urine                                                              | 2 (1)               |
| Rectum, sternal skin                                                                  | 11 (8)              |
| Rectum, urine                                                                         | 11 (8)              |
| Sternum, urine                                                                        | 2 (1)               |
| <b>Three sites</b>                                                                    |                     |
| Tracheal aspirate, rectum, sternal skin                                               | 20 (15)             |
| Tracheal aspirate, rectum, urine                                                      | 8 (6)               |
| Tracheal aspirate, sternal skin, urine                                                | 3 (2)               |
| Rectum, sternal skin, urine                                                           | 6 (4)               |
| <b>Four sites</b>                                                                     |                     |
| Tracheal aspirate, rectum, sternal skin, urine                                        | 10 (8)              |
| <b>Total sites</b>                                                                    |                     |
| Colonization of the tracheal aspirate                                                 | 103 (80)            |
| Colonization at rectum                                                                | 89 (69)             |
| Colonization at sternal skin                                                          | 67 (52)             |
| Colonization at urine                                                                 | 32 (25)             |
| Detection of CR <i>A. baumannii</i> at 1 sites (any site)                             | 70 (54)             |
| Detection of CR <i>A. baumannii</i> at tracheal aspirate and rectum                   | 97 (75)             |
| Detection of CR <i>A. baumannii</i> at tracheal aspirate, rectum, sternal skin        | 104 (80)            |
| Detection of CR <i>A. baumannii</i> at tracheal aspirate, rectum, sternal skin, urine | 108 (85)            |

Because a patient may have >1 colonization site, the total percentage is >100%.

Abbreviation: CR, carbapenem-resistant.

- with carbapenem-resistant or carbapenemase-producing Enterobacteriaceae in acute care facilities. *MMWR Morb Mortal Wkly Rep* **2009**; 58:256–60.
2. Siegel JD, Rhinehart E, Jackson M, Chiarello L; Healthcare Infection Control Practices Advisory Committee. Management of multidrug-resistant organisms in health care settings, 2006. *Am J Infect Control* **2007**; 35(10 suppl 2): S165–93.
  3. Kiratisin P, Chongthaleong A, Tan TY, et al. Comparative in vitro activity of carbapenems against major gram-negative pathogens: results of Asia-Pacific surveillance from the COMPACT II study. *Int J Antimicrob Chemother* **2012**; 39:311–6.
  4. Clinical and Laboratory Standards Institute (CLSI). Performance standards for antimicrobial susceptibility testing: nineteenth informational supplement. Document M100-S19. CLSI: Wayne, PA, **2009**.
  5. Wenzel RP. Reducing surgical site infections. *N Engl J Med* **2010**; 362:75–7.
  6. Wenzel RP, Edmond MB. Infection control: the case for horizontal rather than vertical interventional programs. *Int J Infect Dis* **2010**; 14(suppl 4):S3–5.

Correspondence: Anucha Apisarntharak, MD, Division of Infectious Diseases, Faculty of Medicine, Thammasat University Hospital, Pathumthani, Thailand, 12120 (anapisarn@yahoo.com).

**Clinical Infectious Diseases 2013;56(7):1057–9**

© The Author 2012. Published by Oxford University Press on behalf of the Infectious Diseases Society of America. All rights reserved. For Permissions, please e-mail: journals.permissions@oup.com.  
DOI: 10.1093/cid/cis1024
